# Supplementary material for: The Cat Flea (Ctenocephalides felis) Immune Deficiency Signaling Pathway Regulates Rickettsia typhi Infection
Source: PubMed Central journal article supplement (PMC5736803; doi:10.1128/iai.00562-17), 2017-12-19
Supplement: IAI.00562-17_zii999092265s1.pdf [file IAI.00562-17_zii999092265s1.pdf]

**Table S1 Oligonucleotide sequences for RT-qPCR.**

| <b>AMP gene expression in KC167 cells</b> |                                 |                                           |
|-------------------------------------------|---------------------------------|-------------------------------------------|
| <b>Oligonucleotide name</b>               | <b>Oligonucleotide sequence</b> | <b>NCBI accession number</b>              |
| dmAttachin_F                              | GGCCCATGCCAATTTATTCA            | NM_001169681.2                            |
| dmAttacin_R                               | CATTGCGCTGGAACCTCGAA            | NM_001169681.2                            |
| dmCecropin_F                              | TCTTCGTTTTTCGTGCTCTC            | NM_079849.4                               |
| dmCecropin_R                              | CTTGTTGAGCGATTCCCAGT            | NM_079849.4                               |
| dmDefensin_F                              | GCCAGAAGCGAGCCACAT              | NM_078948.3                               |
| dmDefensin_R                              | CGGTGTGGTTCAGTTCCA              | NM_078948.3                               |
| dmDiptericin_F                            | AGGTGTGGACCAGCGACAA             | NM_057460.4                               |
| dmDiptericin_R                            | TGCTGTCCATATCCTCCATTCA          | NM_057460.4                               |
| dmDrosocin_F                              | GCACAATGAAGTTCACCATCGT          | NM_079020.5                               |
| dmDrosocin_R                              | CCACACCCATGGCAAAAAC             | NM_079020.5                               |
| dmDrosomycin_F                            | CTCCGTGAGAACCTTTTCCA            | NM_079177.4                               |
| dmDrosomycin_R                            | GTATCTTCCGGACAGGCAGT            | NM_079177.4                               |
| dmMetchnikowin_F                          | GCTACATCAGTGCTGGCAGA            | NM_079177.4                               |
| dmMetchnikowin_R                          | AATAAATTGGACCCGGTCT             | NM_079177.4                               |
| dmActin_F                                 | GCGTCGGTCAATTCAATCTT            | NM_078901.3                               |
| dmActin_R                                 | AAGCTGCAACCTCTTCGTCA            | NM_078901.3                               |
| dmRpl32_F                                 | ATGCTAAGCTGTGCGACAAATG          | NM_079843.4                               |
| dmRpl32_R                                 | GTTCGATCCGTAACCGATGT            | NM_079843.4                               |
| <b><i>R. typhi</i> expression</b>         |                                 |                                           |
| <b>Oligonucleotide name</b>               | <b>Oligonucleotide sequence</b> | <b>Reference</b>                          |
| adr1_F                                    | CCACACCAGCACCAGCAAAA            | (1)                                       |
| adr1_R                                    | GCACGGACAGTAGTTCAACC            | (1)                                       |
| ompB_F                                    | TGGTATTACTGCTCAACAAGCT          | (1)                                       |
| ompB_R                                    | CAGTAAAGTCTATTGATCCTACACC       | (1)                                       |
| <b><i>C. felis</i> expression</b>         |                                 |                                           |
| <b>Oligonucleotide name</b>               | <b>Oligonucleotide sequence</b> | <b>NCBI accession number or Reference</b> |
| CfRel1_F                                  | CCTCAATGGAATCTACTTCG            | GAYP02012752                              |
| CfRel1_R                                  | ACTTGTCTGTTGGTTGTTCC            | GAYP02012752                              |
| CfRel2_F                                  | ATCTAGCTGTGGCTGGAGGA            | GAYP02012752                              |
| CfRel2_R                                  | CTAAATGCAGGGGCGTATGT            | GAYP02012752                              |
| CfImd_F                                   | AAGCTCTCATGTGCTCTGAT            | GAYP02008970                              |
| CfImd_R                                   | TTGTTTTGGGTCCAATCTAC            | GAYP02008970                              |
| CfActin_F                                 | CGGAGCCACACATTCTACAATGAACTC     | GR302008.1                                |
| CfActin_R                                 | CATGGTTAGCCTTTGGGTTCAA          | GR302008.1                                |
| CfEf_F                                    | TCGTACTGGCAAATCCACAG            | (2)                                       |
| CfEf_R                                    | CATGTCACGGACAACGAAAC            | (2)                                       |

## REFERENCES

1. Gillespie JJ, Phan IQH, Scheib H, Subramanian S, Edwards TE, Lehman SS, Piitulainen H, Rahman MS, Rennoll-Bankert KE, Staker BL, Taira S, Stacy R, Myler PJ, Azad AF, Pulliainen AT. 2015. Structural Insight into How Bacteria Prevent Interference between Multiple Divergent Type IV Secretion Systems. *MBio* 6:e01867-15.
2. McIntosh CH, Baird J, Zinsen E, Woods DJ, Campbell EM, Bowman AS. 2016. Reference gene selection and RNA preservation protocol in the cat flea, *Ctenocephalides felis*, for gene expression studies. *Parasitology* 143:1532–1542.

**Table S2 siRNA sequences for knockdown in *C. felis*.**

| <b>siRNA name</b>                | <b>siRNA sequence</b>                                                   | <b>NCBI accession number used to design siRNA</b> |
|----------------------------------|-------------------------------------------------------------------------|---------------------------------------------------|
| CfNeg siRNA 1                    | sic001-10nmol mission siRNA<br>universal negative control #1<br>(Sigma) |                                                   |
| CfNeg siRNA 2                    | sic002-10nmol mission siRNA<br>universal negative control #2<br>(Sigma) |                                                   |
| CfRelish siRNA<br>206_sense      | GCA GAU AUG UAA UGG CUG A                                               | GAYP02012752                                      |
| CfRelish siRNA<br>206_antisense  | UCA GCC AUU ACA UAU CUG C                                               | GAYP02012752                                      |
| CfRelish siRNA<br>676_sense      | CCA UUG AGA CAA AGU GAA A                                               | GAYP02012752                                      |
| CfRelish siRNA<br>676_antisense  | UUU CAC UUU GUC UCA AUG G                                               | GAYP02012752                                      |
| CfRelish siRNA<br>1277_sense     | CAC CAG AAU UCA UCA GUA A                                               | GAYP02012752                                      |
| CfRelish siRNA<br>1277_antisense | UUA CUG AUG AAU UCU GGU G                                               | GAYP02012752                                      |
| Cflmd siRNA<br>158_sense         | CAG UUA GGC CAG CAA GAA A                                               | GAYP02008970                                      |
| Cflmd siRNA<br>158_antisense     | UUU CUU GCU GGC CUA ACU G                                               | GAYP02008970                                      |
| Cflmd siRNA<br>208_sense         | GAA CAG AAC AUU GGA GAA A                                               | GAYP02008970                                      |
| Cflmd siRNA<br>208_antisense     | UUU CUC CAA UGU UCU GUU C                                               | GAYP02008970                                      |
| Cflmd siRNA<br>383_sense         | CCU CAA UAC AGG AAG AUG A                                               | GAYP02008970                                      |
| Cflmd siRNA<br>383_antisense     | UCA UCU UCC UGU AUU GAG G                                               | GAYP02008970                                      |

**Table S3 Raw data used for analysis of the PCR array conducted in uninfected (Vero 1-5) and *R. typhi* infected (RT 1-5) KC167 cells**

| Well | Gene Symbol | Vero 1 | Vero 2 | Vero 3 | Vero 4 | Vero 5 | Rt 1  | Rt 2  | Rt 3  | Rt 4  | Rt 5  |
|------|-------------|--------|--------|--------|--------|--------|-------|-------|-------|-------|-------|
| A1   | arr         | 25.52  | 25.52  | 24.79  | 26.47  | 26.07  | 27.34 | 25.19 | 26.22 | 26.29 | 25.47 |
| A2   | ato         | 34.83  | 34.83  | 32.16  | 32.77  | 37.47  | 35.2  | 33.63 | 39.14 | 35.39 | 30.98 |
| A3   | AttA        | 29.44  | 29.44  | 29.41  | 30.61  | 29.61  | 27.52 | 25.52 | 27.64 | 27.48 | 26.71 |
| A4   | AttB        | 30.26  | 30.26  | 28.68  | 30.46  | 29.56  | 27.67 | 25.91 | 28.44 | 27.46 | 26.41 |
| A5   | AttC        | No Ct  | No Ct  | No Ct  | 37.96  | 38.14  | 33.71 | 33.57 | 34.5  | No Ct | 34.75 |
| A6   | AttD        | 34.06  | 34.06  | 31.97  | 30.68  | 31.1   | 31.5  | 29.06 | 30.89 | 30.18 | 28.56 |
| A7   | Axn         | 25.28  | 25.28  | 23.72  | 25.77  | 25.53  | 26.42 | 25.19 | 26.3  | 25.35 | 24.19 |
| A8   | bnl         | 23.49  | 23.49  | 23.4   | 23.95  | 23.93  | 25.02 | 23.26 | 24.05 | 23.94 | 23.12 |
| A9   | brk         | 26.01  | 26.01  | 25.4   | 26.96  | 26.83  | 27.42 | 25.75 | 27.05 | 26.54 | 25.99 |
| A10  | byn         | No Ct  | No Ct  | No Ct  | No Ct  | No Ct  | No Ct | 38.98 | 33.43 | 37.82 | 30.33 |
| A11  | cact        | 22.25  | 22.25  | 21.47  | 22.9   | 22.95  | 23.53 | 21.62 | 22.73 | 22.69 | 22.12 |
| A12  | cathD       | 20.99  | 20.99  | 20.37  | 21.68  | 21.35  | 22.45 | 20.57 | 21.89 | 21.47 | 20.91 |
| B1   | CG10899     | 32.53  | 32.53  | 32.81  | 32.95  | 32.22  | 32.45 | 31.54 | 31.93 | 33.94 | 31.04 |
| B2   | CG10924     | 22.98  | 22.98  | 22.07  | 24.69  | 24.54  | 24.33 | 22.59 | 23.5  | 24.34 | 24.03 |
| B3   | CG2107      | 24.67  | 24.67  | 23.66  | 24.83  | 24.75  | 25.84 | 24.01 | 25.54 | 24.95 | 24.41 |
| B4   | CG3961      | 23.77  | 23.77  | 22.78  | 24.99  | 24.89  | 24.85 | 22.99 | 24.29 | 24.95 | 24.34 |
| B5   | CG8630      | 32.39  | 32.39  | No Ct  | No Ct  | No Ct  | 34.94 | No Ct | 34.1  | No Ct | 33.42 |
| B6   | Csp         | 23.21  | 23.21  | 22.24  | 24.1   | 24.23  | 24.38 | 22.63 | 24.12 | 24.08 | 23.34 |
| B7   | CycD        | 25.26  | 25.26  | 24.03  | 25.45  | 24.95  | 26.32 | 24.43 | 25.83 | 25.32 | 24.1  |
| B8   | CycE        | 26.21  | 26.21  | 24.81  | 26.65  | 26.68  | 27.32 | 25.4  | 26.34 | 26.48 | 25.86 |
| B9   | CycG        | 20.82  | 20.82  | 20.55  | 21.76  | 21.63  | 22.6  | 20.64 | 21.83 | 21.73 | 20.88 |
| B10  | Cyp4e1      | 25.24  | 25.24  | 24.44  | 27.28  | 27.11  | 26.34 | 25.05 | 25.76 | 26.93 | 26.67 |
| B11  | dally       | 26.25  | 26.25  | 25.91  | 26.81  | 26.32  | 27.6  | 26.12 | 27.3  | 26.54 | 26.17 |
| B12  | Def         | 30.85  | 30.85  | 29.61  | 32.25  | 34.81  | 32.84 | 30.05 | 32.48 | 31.95 | 32.59 |
| C1   | DI_Delta    | 30.34  | 30.34  | 29.25  | 30.36  | 30.51  | 30.8  | 31.04 | 32.47 | 30.69 | 29.71 |
| C2   | dm          | 23.39  | 23.39  | 22.62  | 23.78  | 23.76  | 25.27 | 22.91 | 23.96 | 23.57 | 22.54 |
| C3   | dpp         | 26.74  | 26.74  | 26.04  | 28.84  | 28.42  | 28.51 | 26.84 | 27.39 | 28.49 | 28.3  |
| C4   | Drs         | 27.42  | 27.42  | 26.73  | 29.05  | 28.34  | 28.78 | 27.06 | 27.93 | 29.19 | 27.95 |
| C5   | Ef1alpha48D | 17.63  | 17.63  | 17.34  | 18.14  | 18.12  | 18.97 | 17.62 | 18.61 | 18.07 | 17.61 |
| C6   | ex          | 24.67  | 24.67  | 23.73  | 25.05  | 24.97  | 25.94 | 24.4  | 25.38 | 24.95 | 24.43 |
| C7   | Fatp        | 24.77  | 24.77  | 23.38  | 24.77  | 24.52  | 25.84 | 24.34 | 25.69 | 24.82 | 24.21 |
| C8   | fj          | No Ct  | No Ct  | No Ct  | No Ct  | 39.71  | 39.8  | No Ct | No Ct | No Ct | 32.64 |
| C9   | fkf         | 33.7   | 33.7   | 31.83  | 34.99  | 34.64  | 34.7  | No Ct | 34.91 | 35.8  | 33.77 |
| C10  | fng         | 28.98  | 28.98  | 27.18  | 28.78  | 29.34  | 30.03 | 28.49 | 29.61 | 28.98 | 28.62 |
| C11  | Fs          | 25.4   | 25.4   | 24.35  | 25.79  | 25.57  | 26.48 | 25.07 | 25.81 | 26.04 | 25.39 |
| C12  | fz          | 25.78  | 25.78  | 24.57  | 28.76  | 28.89  | 27.22 | 25.73 | 26.25 | 28.94 | 28.23 |
| D1   | Galphaf     | 26.47  | 26.47  | 25.39  | 29.52  | 29.48  | 27.19 | 25.63 | 26.49 | 30.29 | 27.48 |
| D2   | Gclm        | 24.46  | 24.46  | 23.54  | 24.51  | 24.3   | 25.39 | 23.62 | 24.98 | 24.55 | 23.89 |
| D3   | Glut1       | 24.56  | 24.56  | 23.77  | 25.52  | 25.38  | 25.81 | 24.45 | 25.24 | 25.29 | 24.78 |
| D4   | grn         | 34.33  | 34.33  | No Ct  | 35.19  | No Ct  | 35.23 | 35.42 | 33.58 | 34.99 | 32.21 |
| D5   | GstD1       | 18.04  | 18.04  | 17.75  | 18.86  | 18.57  | 19.28 | 17.79 | 18.77 | 18.77 | 18.41 |
| D6   | h           | 22.12  | 22.12  | 21.57  | 22.95  | 23.21  | 23.85 | 21.94 | 23.09 | 22.85 | 22.43 |

|     |         |       |       |       |       |       |       |       |       |       |       |
|-----|---------|-------|-------|-------|-------|-------|-------|-------|-------|-------|-------|
| D7  | hb      | No Ct | No Ct | 34.4  | No Ct | 35.4  | 36.66 | 39.95 | 34.14 | No Ct | 38.5  |
| D8  | Hey     | No Ct | No Ct | 37.18 | No Ct | No Ct | No Ct | No Ct | No Ct | No Ct | 35.86 |
| D9  | hkb     | 30.65 | 30.65 | 30.67 | 33.87 | No Ct | 32.85 | 31.06 | 30.84 | No Ct | 30.94 |
| D10 | Hsc70-1 | 33.55 | 33.55 | No Ct | 33.35 | No Ct | 34.35 | No Ct | No Ct | 32.99 | 35.59 |
| D11 | Hsp27   | 20.47 | 20.47 | 19.77 | 21.79 | 21.6  | 21.65 | 20.07 | 21.19 | 21.97 | 21.24 |
| D12 | iHog    | 25.74 | 25.74 | 25.41 | 26.13 | 26.1  | 27.68 | 25.48 | 26.66 | 26.27 | 25.77 |
| E1  | ImpL3   | 25.04 | 25.04 | 25.29 | 25.08 | 25.19 | 27.08 | 24.44 | 25.94 | 24.61 | 25.39 |
| E2  | Ir76a   | 25.12 | 25.12 | 24.59 | 25.69 | 25.3  | 26.57 | 24.29 | 25.9  | 25.56 | 24.85 |
| E3  | Keap1   | 23.38 | 23.38 | 22.53 | 24.22 | 24.13 | 24.77 | 22.9  | 23.96 | 23.97 | 23.6  |
| E4  | kibra   | 24.41 | 24.41 | 24.08 | 25.06 | 24.46 | 26.19 | 23.96 | 25.18 | 24.54 | 24.05 |
| E5  | mdy     | 21.21 | 21.21 | 20.53 | 22.47 | 22.13 | 22.59 | 20.76 | 21.9  | 22.23 | 21.69 |
| E6  | mirr    | 26.3  | 26.3  | 25.83 | 27.28 | 27.23 | 28.25 | 26.65 | 27.3  | 27.01 | 26.26 |
| E7  | Mtk     | 29.3  | 29.3  | 28.91 | 31.56 | 31.18 | 30.21 | 28.31 | 30.65 | 29.72 | 28.7  |
| E8  | PCNA    | 20.53 | 20.53 | 19.63 | 20.47 | 20.46 | 21.52 | 19.85 | 21    | 20.36 | 19.9  |
| E9  | N       | 26.13 | 26.13 | 25.11 | 26.43 | 26.24 | 27.55 | 26.17 | 26.7  | 26.13 | 25.4  |
| E10 | net     | 26.59 | 26.59 | 25.67 | 28.45 | 28.07 | 27.86 | 26.01 | 27.32 | 28.12 | 27.08 |
| E11 | nmo     | 28.72 | 28.72 | 28.14 | 29.96 | 29.82 | 30.79 | 28.28 | 28.63 | 28.97 | 28.61 |
| E12 | Odc1    | No Ct | No Ct | No Ct | 35.72 | No Ct | No Ct | No Ct | 35.61 | No Ct | 36.05 |
| F1  | Odc2    | 32.68 | 32.68 | 37.28 | No Ct | No Ct | No Ct | 33.15 | No Ct | No Ct | 34.93 |
| F2  | os      | No Ct | No Ct | No Ct | 34.64 | 33.6  | No Ct | No Ct | 34.31 | 32.57 | 37.86 |
| F3  | p53     | 21.4  | 21.4  | 20.72 | 21.29 | 21.16 | 22.43 | 20.65 | 21.92 | 21.51 | 20.81 |
| F4  | pan     | 23.55 | 23.55 | 22.9  | 24.91 | 25.02 | 25.02 | 23.12 | 24.22 | 24.77 | 24.02 |
| F5  | Pdk1    | 23.92 | 23.92 | 23.53 | 24.82 | 24.46 | 25.33 | 23.45 | 24.17 | 24.6  | 23.98 |
| F6  | ptc     | 27.4  | 27.4  | 27.08 | 28.91 | 28.92 | 29.58 | 27.3  | 27.62 | 28.47 | 28.13 |
| F7  | ref(2)P | 22.25 | 22.25 | 21.54 | 22.87 | 22.77 | 23.65 | 22.13 | 22.7  | 22.64 | 22.47 |
| F8  | rept    | 24.61 | 24.61 | 23.44 | 24.56 | 24.6  | 25.89 | 24.12 | 24.97 | 24.14 | 23.79 |
| F9  | slmb    | 23.43 | 23.43 | 22.77 | 23.95 | 23.76 | 24.67 | 23.42 | 24.44 | 23.96 | 23.31 |
| F10 | smo     | 23.97 | 23.97 | 23.31 | 24.66 | 24.73 | 25.25 | 23.3  | 24.43 | 24.63 | 23.96 |
| F11 | Socs36E | 24.24 | 24.24 | 23.74 | 24.55 | 24.15 | 25.8  | 24.07 | 25.12 | 24.28 | 24.05 |
| F12 | spi     | 20.73 | 20.73 | 19.95 | 21.56 | 21.34 | 22.09 | 19.98 | 21.3  | 21.73 | 20.98 |
| G1  | tgo     | 23.06 | 23.06 | 22.52 | 23.91 | 23.8  | 24.58 | 22.57 | 23.66 | 23.53 | 23.09 |
| G2  | th      | 21.9  | 21.9  | 21.59 | 23.03 | 22.76 | 23.54 | 21.77 | 22.94 | 23.03 | 22.21 |
| G3  | tll     | No Ct | No Ct | No Ct | No Ct | 33.54 | 35.05 | 34.06 | 34.64 | No Ct | 35.78 |
| G4  | Trx-2   | 21.26 | 21.26 | 20.12 | 21.49 | 21.34 | 22.25 | 20.59 | 21.81 | 21.93 | 21.29 |
| G5  | Tsp66E  | 28.84 | 28.84 | 27.36 | 28.54 | 29.16 | 29.4  | 28.09 | 29.03 | 28.61 | 27.91 |
| G6  | Ubx     | No Ct | No Ct | No Ct | No Ct | 32.42 | 34    | 32.18 | 38.86 | No Ct | 33.3  |
| G7  | upd2    | 29    | 29    | 27.97 | 27.85 | 27.43 | 30.08 | 29.3  | 29.63 | 27.67 | 26.66 |
| G8  | upd3    | 26.86 | 26.86 | 26.03 | 25.83 | 25.61 | 28.15 | 26.44 | 27.59 | 25.74 | 25.07 |
| G9  | vn      | 25.88 | 25.88 | 25.09 | 26.41 | 26.34 | 27.19 | 25.7  | 26.4  | 26.34 | 25.63 |
| G10 | wg      | 34.91 | 34.91 | 34.71 | 36.09 | 35.23 | 36.01 | 33.19 | 35.29 | 35.29 | 28.17 |
| G11 | Wnt4    | 33.06 | 33.06 | 36.66 | 38.76 | 34.7  | 35.05 | No Ct | 33.13 | No Ct | 30.59 |
| G12 | Wnt5    | 24.46 | 24.46 | 23.52 | 24.4  | 24.31 | 26    | 23.99 | 25.12 | 24.42 | 23.65 |
| H1  | Act42A  | 20.91 | 20.91 | 19.98 | 21.01 | 20.95 | 21.82 | 20.35 | 21.48 | 20.45 | 19.4  |
| H2  | Gapdh1  | 21.01 | 21.01 | 20.2  | 21.33 | 21.27 | 22.09 | 20.14 | 21.63 | 21.28 | 20.28 |
| H3  | RpL32   | 17.4  | 17.4  | 16.69 | 17.81 | 17.73 | 17.99 | 16.91 | 17.98 | 17.93 | 17.6  |
| H4  | SdhA    | 23.06 | 23.06 | 22.34 | 23.37 | 23.27 | 24.58 | 22.47 | 23.74 | 23.07 | 22.77 |

|     |      |       |       |       |       |       |       |       |       |       |       |
|-----|------|-------|-------|-------|-------|-------|-------|-------|-------|-------|-------|
| H5  | Tbp  | 23.86 | 23.86 | 23.61 | 24.74 | 24.26 | 25.31 | 23.31 | 24.66 | 24.39 | 23.94 |
| H6  | DGDC | 34.1  | 34.1  | No Ct | No Ct | No Ct | No Ct | No Ct | No Ct | No Ct | 34.83 |
| H7  | RTC  | 20.64 | 20.64 | 19.52 | 20.59 | 20.15 | 21.42 | 20.45 | 20.99 | 20.27 | 20.16 |
| H8  | RTC  | 20.74 | 20.74 | 19.63 | 20.7  | 20.2  | 21.46 | 20.42 | 21.08 | 20.28 | 20.21 |
| H9  | RTC  | 20.63 | 20.63 | 19.47 | 20.46 | 20.14 | 21.42 | 20.38 | 21.07 | 20.25 | 20.14 |
| H10 | PPC  | 17.66 | 17.66 | 16.87 | 18.36 | 18.04 | 18.42 | 17.87 | 18.26 | 18.05 | 17.82 |
| H11 | PPC  | 17.81 | 17.81 | 16.92 | 18.36 | 18.03 | 18.56 | 17.92 | 18.2  | 17.97 | 17.82 |
| H12 | PPC  | 17.82 | 17.82 | 16.82 | 18.4  | 18.08 | 18.56 | 18.01 | 18.09 | 18.11 | 17.79 |
